# Supplementary material for: Electrochemical performances of cobalt oxide–carbon nanotubes electrodes via different methods as negative material for alkaline rechargeable batteries
Source: Royal Society of Chemistry journal article supplement (doi:10.1039/c5ra12721a), 2015-01-01
Supplement: c5ra12721a1.pdf [file c5ra12721a1.pdf]

# Electrochemical performances of cobalt oxide-carbon nanotubes electrodes via different methods as negative material for alkaline rechargeable batteries

Yanan Xu, Yanyin Dong, Xiaofeng Wang, Yijing Wang,\* Lifang Jiao, Huatang Yuan and Jing Li

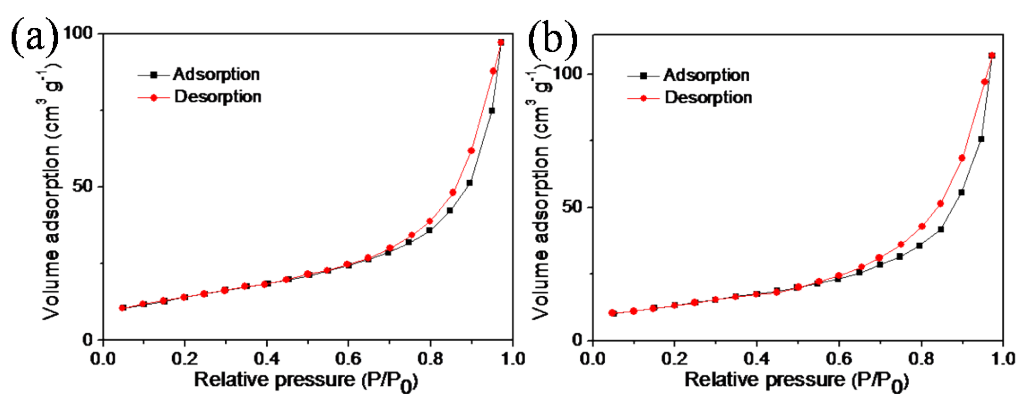

Fig. 1 Nitrogen adsorption and desorption isotherms of Co<sub>3</sub>O<sub>4</sub>/CNTs-A (a) and Co<sub>3</sub>O<sub>4</sub>/CNTs-B (b) samples

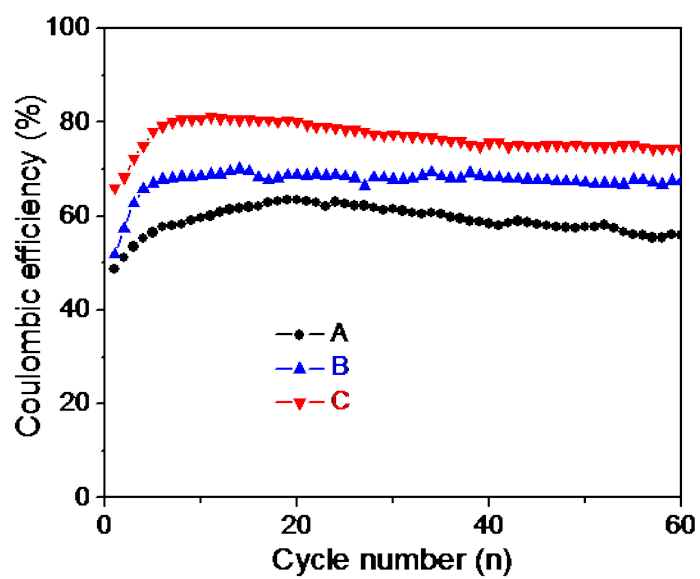

Fig. S2 Coulombic efficiency of various  $\text{Co}_3\text{O}_4/\text{CNTs}$  composites during cycling.
